# Supplementary material for: A mitochondria-localized iridium(iii)–chlorin E6 conjugate for synergistic sonodynamic and two-photon photodynamic therapy against melanoma
Source: Royal Society of Chemistry journal article supplement (doi:10.1039/d2qi00635a), 2022-01-01
Supplement: d2qi00635a1.pdf [file d2qi00635a1.pdf]

## Supporting Information

### **A Mitochondria-Localized Iridium(III)-Chlorin E6 Conjugate for Synergistic Sonodynamic and Two-Photon Photodynamic Therapy against Melanoma**

Zhuoli Chen,<sup>a</sup> Tao Feng,<sup>a</sup> Jinchao Shen,<sup>a</sup> Johannes Karges,<sup>b</sup> Chengzhi Jin,<sup>a</sup> Yukun Zhao,<sup>c\*</sup>  
Liangnian Ji,<sup>a</sup> Hui Chao<sup>a,d,\*</sup>

<sup>a</sup> MOE Key Laboratory of Bioinorganic and Synthetic Chemistry, School of Chemistry, Guangdong Provincial Key Laboratory of Digestive Cancer Research, The Seventh Affiliated Hospital, Sun Yat-Sen University, Guangzhou, 510006, P. R. China. E-mail: ceschh@mail.sysu.edu.cn

<sup>b</sup> Department of Chemistry and Biochemistry, University of California, San Diego, 9500 Gilman Drive, La Jolla, CA 92093, United States.

<sup>c</sup> Department of Dermatology, The Eastern Division of the First Affiliated Hospital, Sun Yat-Sen University, Guangzhou, 510275, P. R. China. E-mail: zhaoyukun7288569@sina.com

<sup>d</sup> MOE Key Laboratory of Theoretical Organic Chemistry and Functional Molecule, School of Chemistry and Chemical Engineering, Hunan University of Science and Technology, Xiangtan, 400201, P. R. China.

## Table of Contents

|                                                                                                                                                                                                                                                                                                                                                                                                                                                                                                                                                                                                                                                                                                                                                                                                                                                                                                                                                   |    |
|---------------------------------------------------------------------------------------------------------------------------------------------------------------------------------------------------------------------------------------------------------------------------------------------------------------------------------------------------------------------------------------------------------------------------------------------------------------------------------------------------------------------------------------------------------------------------------------------------------------------------------------------------------------------------------------------------------------------------------------------------------------------------------------------------------------------------------------------------------------------------------------------------------------------------------------------------|----|
| <b>Scheme S1.</b> Synthesis of <b>IrCe6</b> . a) SeO <sub>2</sub> , dioxane, dark, Ar purge, 105 °C, 24 h; b) AgNO <sub>3</sub> , NaOH, EtOH, dark, rt, 24 h; c) pyBOP, DIEA, dry DMF, rt, 30 min; DCM, TFA, rt, 30 min. d) MeOH, H <sub>2</sub> SO <sub>4</sub> , rt, 24 h; e) pyBOP, DIEA, dry DMF, rt, 30 min; f) DCM, MeOH, 65 °C, dark, Ar purge, 6 h. ....                                                                                                                                                                                                                                                                                                                                                                                                                                                                                                                                                                                  | 4  |
| <b>Figure S1.</b> HR-ESI-MS spectra of <b>IrCe6</b> in MeOH. $m/z = C_{76}H_{78}IrN_{10}O_6$ , 1419.5735 [M] <sup>+</sup> , found, 1419.5699, $m/z = 710.2901$ [M-H] <sup>2+</sup> , found, 710.2880.....                                                                                                                                                                                                                                                                                                                                                                                                                                                                                                                                                                                                                                                                                                                                         | 5  |
| <b>Figure S2.</b> <sup>1</sup> H-NMR spectrum of <b>IrCe6</b> (400 MHz, Acetonitrile- <i>d</i> <sub>3</sub> ). ....                                                                                                                                                                                                                                                                                                                                                                                                                                                                                                                                                                                                                                                                                                                                                                                                                               | 6  |
| <b>Figure S3.</b> <sup>1</sup> H-NMR spectrum of <b>Chlorin e6-bpy</b> . (400 MHz, Chloroform- <i>d</i> ). ....                                                                                                                                                                                                                                                                                                                                                                                                                                                                                                                                                                                                                                                                                                                                                                                                                                   | 7  |
| <b>Figure S4.</b> (a) Average effective diameter and zeta potential of <b>NPs</b> (n = 3). (b) Transmission electron microscopy image of <b>NPs</b> . (c) Release kinetics of <b>NPs</b> in water under physiological (pH=7.4) or acidic (pH=5.5) conditions (n = 3).....                                                                                                                                                                                                                                                                                                                                                                                                                                                                                                                                                                                                                                                                         | 8  |
| <b>Figure S5.</b> Change in absorption of DPBF at 416 nm upon incubation with <b>Ir</b> , <b>IrCe6</b> , or <b>Ce6</b> (0.5 μM) and exposure to (a) ultrasound radiation (1 MHz, 50% duty cycle, 1.5 W cm <sup>-2</sup> , 1 min) or (b) light irradiation (405 nm, 0.5 J cm <sup>-2</sup> ). ....                                                                                                                                                                                                                                                                                                                                                                                                                                                                                                                                                                                                                                                 | 9  |
| <b>Figure S6.</b> UV-vis spectra of DPBF upon incubation with <b>Ir</b> , <b>IrCe6</b> , or <b>Ce6</b> (0.5 μM) and exposure to ultrasound radiation (1 MHz, 50% duty cycle, 1.5 W cm <sup>-2</sup> , 1 min), light irradiation (405 nm, 0.5 J cm <sup>-2</sup> ) or the combination of ultrasound radiation and light irradiation. ....                                                                                                                                                                                                                                                                                                                                                                                                                                                                                                                                                                                                          | 10 |
| <b>Figure S7.</b> Determination of the singlet oxygen quantum yield of <b>Ce6</b> and <b>IrCe6</b> upon light irradiation (405 nm, 0.5 J cm <sup>-2</sup> ). ....                                                                                                                                                                                                                                                                                                                                                                                                                                                                                                                                                                                                                                                                                                                                                                                 | 11 |
| <b>Figure S8.</b> Representative flow cytometry results of the time-dependent cellular uptake of <b>talaporfin</b> , <b>IrCe6</b> , or <b>NPs</b> in A375 cells using the APC channel. ....                                                                                                                                                                                                                                                                                                                                                                                                                                                                                                                                                                                                                                                                                                                                                       | 12 |
| <b>Figure S9.</b> Representative flow cytometry results of the time-dependent cellular uptake of <b>NPs</b> in L02 cells or A375 cells using the APC channel. ....                                                                                                                                                                                                                                                                                                                                                                                                                                                                                                                                                                                                                                                                                                                                                                                | 12 |
| <b>Figure S10.</b> Confocal laser scanning microscopy images of A375 cells incubated with <b>talaporfin</b> or <b>IrCe6</b> for 8 h and co-stained with Lyso-Tracker Green (LTG) or Mito-Tracker Green (MTG), Scale bars: 10 μm. ....                                                                                                                                                                                                                                                                                                                                                                                                                                                                                                                                                                                                                                                                                                             | 13 |
| <b>Figure S11.</b> Confocal laser scanning microscopy images of the mixture of fluorescent dye carboxyfluorescein diacetate succinimidyl ester (CFSE) labeled non-cancerous L02 cells and unlabeled cancerous A375 cells, the mixture of cells was incubated with <b>IrCe6</b> for 8 h. Scale bars: 10 μm.....                                                                                                                                                                                                                                                                                                                                                                                                                                                                                                                                                                                                                                    | 13 |
| <b>Figure S12.</b> Confocal imaging of A375 cells incubated with increased concentration of <b>IrCe6</b> (0, 0.5, 1, 6, 12 μM) for 8 h. The excitation wavelength for <b>IrCe6</b> was set at 405 nm and the luminescence was recorded from 650 to 680 nm. Scale bars: 10 μm. ....                                                                                                                                                                                                                                                                                                                                                                                                                                                                                                                                                                                                                                                                | 14 |
| <b>Figure S13.</b> (a) Relative cell viability of A375 cells treated with ultrasound radiation (1 MHz, 50% duty cycle) using various power intensities and radiation times. (b) Relative cell viability of A375 cells incubated with increasing concentrations of <b>talaporfin</b> and exposure to ultrasound radiation (1 MHz, 50% duty cycle, 1.5 W cm <sup>-2</sup> , 2 min) and/or light irradiation (405 nm, 0.5 J cm <sup>-2</sup> ). (c) Relative cell viability of L02 cells incubated with increasing concentrations of <b>talaporfin</b> and exposure to ultrasound radiation (1 MHz, 50% duty cycle, 1.5 W cm <sup>-2</sup> , 2 min) and/or light irradiation (405 nm, 0.5 J cm <sup>-2</sup> ). (d) Relative cell viability of L02 cells incubated with increasing concentrations of <b>NPs</b> and exposure to ultrasound radiation (1 MHz, 50% duty cycle, 1.5 W cm <sup>-2</sup> , 2 min) and/or light irradiation (405 nm, 0.5 J |    |

cm<sup>-2</sup>).....15

**Figure S14.** Relative caspase 3/7 activity of A375 cells incubated with **NPs** upon incubation in dark; exposure to ultrasound radiation (1 MHz, 50% duty cycle, 1.5 W cm<sup>-2</sup>, 2 min); exposure to light irradiation (405 nm, 0.5 J cm<sup>-2</sup>), or exposure to a combination of ultrasound radiation and light irradiation (n = 3).....16

**Figure S15.** Biodistribution of **NPs** in major organs and tumor 4 h, 12 h, or 24 h after the administration examined by ICP-MS (n = 3). .....17

**Figure S16.** H&E stained histopathologic slices of the major organs of A375 tumor xenograft mice after various treatments. Scale bars: 50 μm.....18

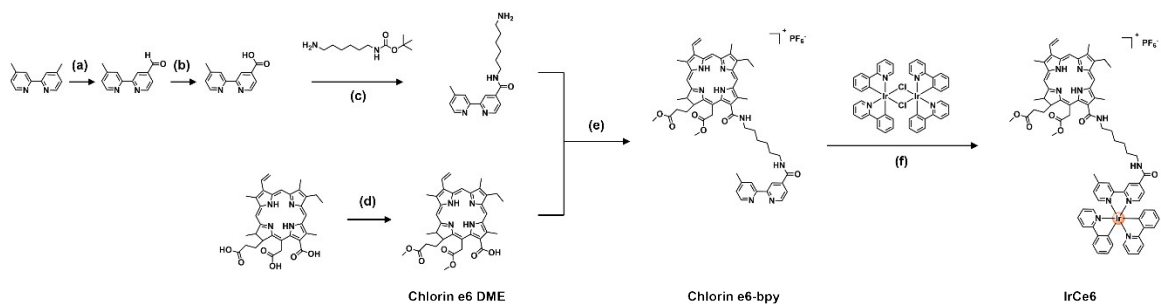

**Scheme S1.** Synthesis of **IrCe6**. a)  $\text{SeO}_2$ , dioxane, dark, Ar purge,  $105\text{ }^\circ\text{C}$ , 24 h; b)  $\text{AgNO}_3$ ,  $\text{NaOH}$ ,  $\text{EtOH}$ , dark, rt, 24 h; c)  $\text{pyBOP}$ ,  $\text{DIEA}$ , dry  $\text{DMF}$ , rt, 30 min;  $\text{DCM}$ ,  $\text{TFA}$ , rt, 30 min. d)  $\text{MeOH}$ ,  $\text{H}_2\text{SO}_4$ , rt, 24 h; e)  $\text{pyBOP}$ ,  $\text{DIEA}$ , dry  $\text{DMF}$ , rt, 30 min; f)  $\text{DCM}$ ,  $\text{MeOH}$ ,  $65\text{ }^\circ\text{C}$ , dark, Ar purge, 6 h.

chzhi #212 RT: 0.94 AV: 1 NL: 9.04E6  
T: FTMS + p ESI Full ms [600.0000-2000.0000]

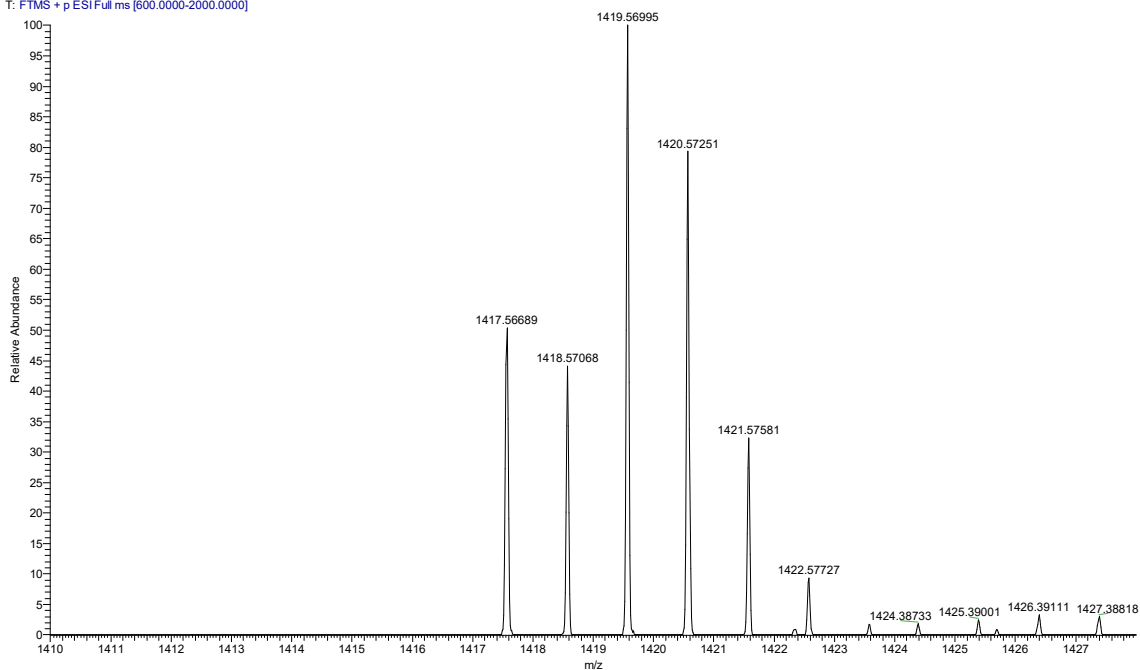

chzhi #212 RT: 0.94 AV: 1 NL: 1.09E7  
T: FTMS + p ESI Full ms [600.0000-2000.0000]

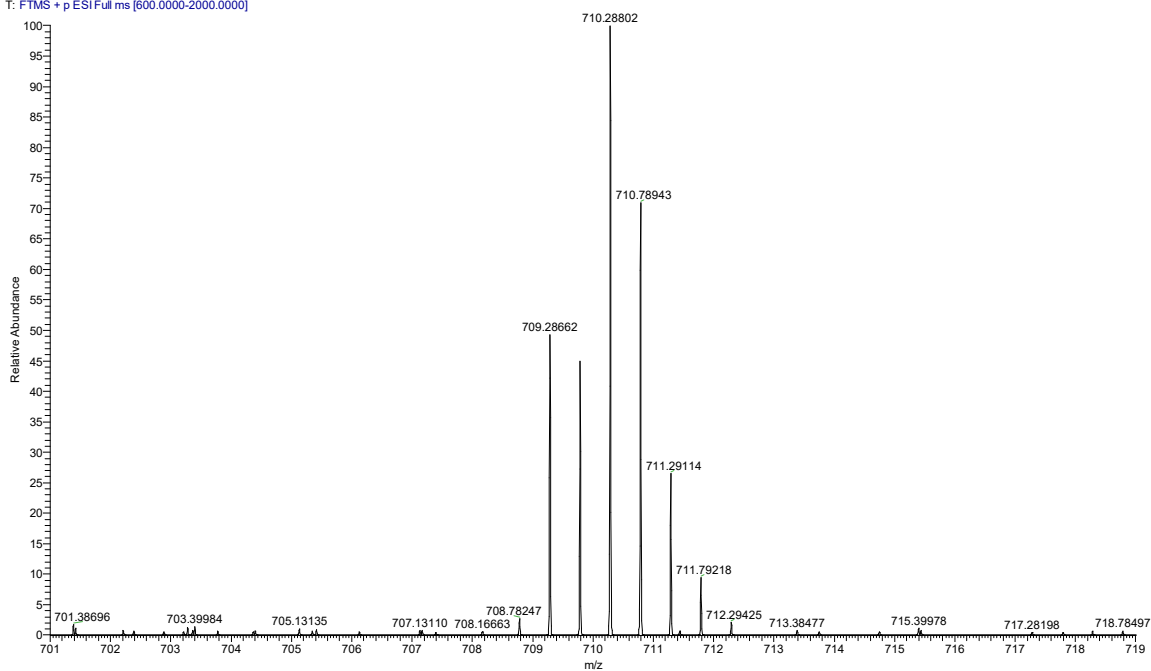

**Figure S1.** HR-ESI-MS spectra of IrCe6 in MeOH.  $m/z = C_{76}H_{78}IrN_{10}O_6$ , 1419.5735 [M]<sup>+</sup>, found, 1419.5699,  $m/z = 710.2901$  [M-H]<sup>2+</sup>, found, 710.2880.

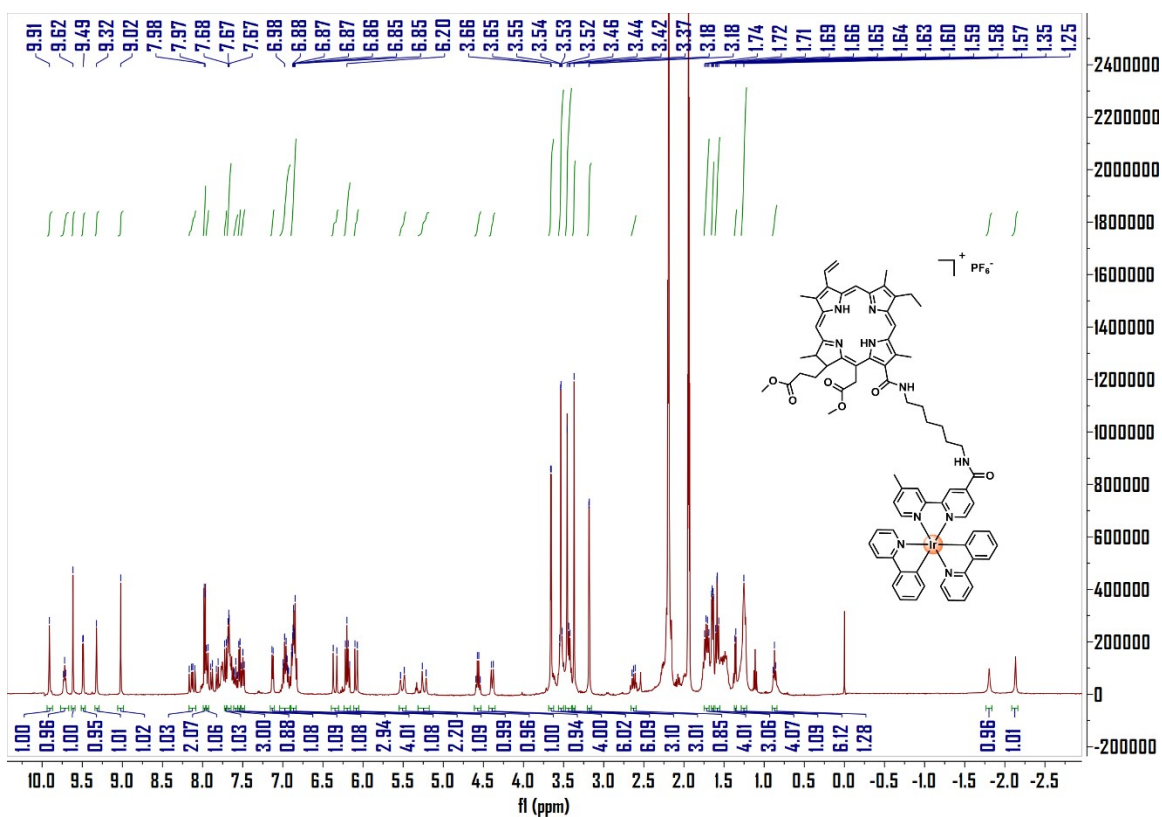

**Figure S2.** <sup>1</sup>H-NMR spectrum of IrCe6 (400 MHz, Acetonitrile-*d*<sub>3</sub>).

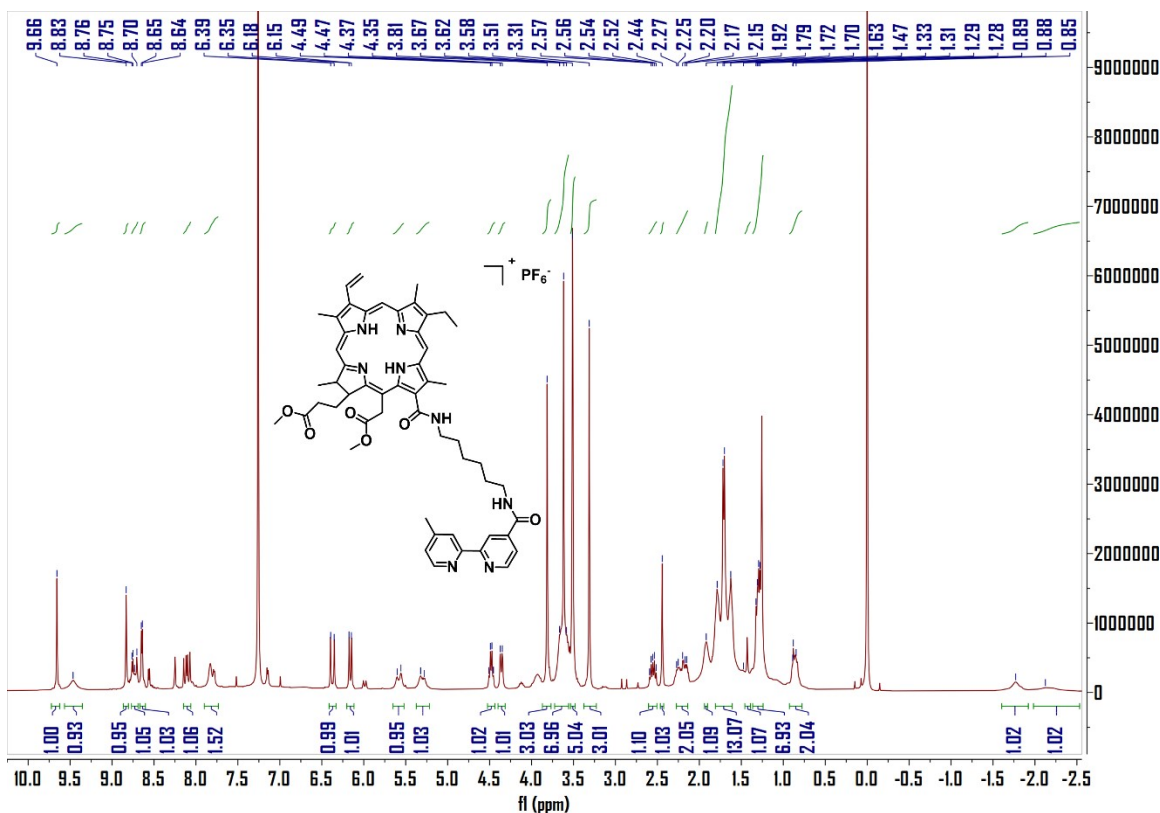

**Figure S3.**  $^1\text{H}$ -NMR spectrum of **Chlorin e6-bpy**. (400 MHz, Chloroform-*d*)  $\delta$  9.66 (s, 1H), 9.46 (s, 1H), 8.83 (s, 1H), 8.77 – 8.69 (m, 1H), 8.64 (d,  $J = 5.0$  Hz, 1H), 8.11 (dd,  $J = 17.8$ , 11.5 Hz, 1H), 7.90 – 7.73 (m, 2H), 6.37 (d,  $J = 16.4$  Hz, 1H), 6.16 (d,  $J = 11.4$  Hz, 1H), 5.58 (d,  $J = 17.7$  Hz, 1H), 5.30 (d,  $J = 16.3$  Hz, 1H), 4.48 (q,  $J = 7.2$  Hz, 1H), 4.36 (d,  $J = 9.6$  Hz, 1H), 3.81 (s, 3H), 3.62 (s, 7H), 3.51 (s, 5H), 3.31 (s, 3H), 2.56 (dt,  $J = 15.7$ , 7.7 Hz, 1H), 2.44 (s, 1H), 2.27 – 2.14 (m, 2H), 1.92 (s, 1H), 1.81 – 1.61 (m, 13H), 1.43 (s, 1H), 1.30 (dd,  $J = 12.6$ , 6.7 Hz, 7H), 0.93 – 0.78 (m, 2H), -1.77 (s, 1H), -2.12 (s, 1H).

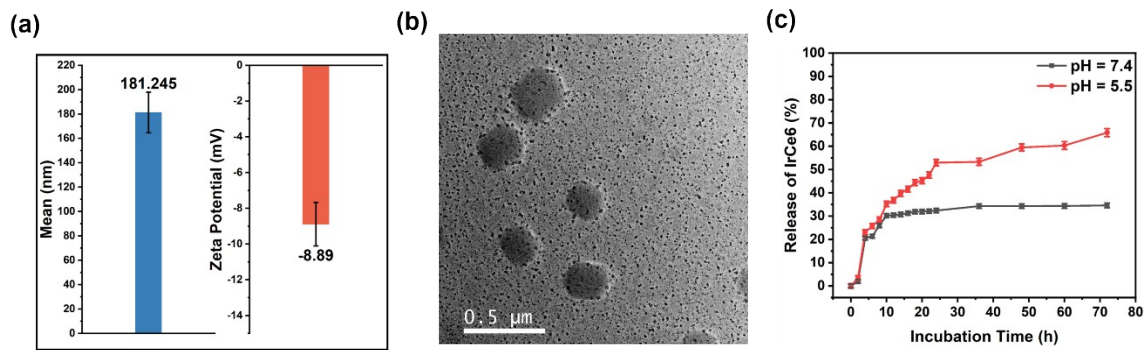

**Figure S4.** (a) Average effective diameter and zeta potential of **NPs** ( $n = 3$ ). (b) Transmission electron microscopy image of **NPs**. (c) Release kinetics of **NPs** in water under physiological ( $\text{pH}=7.4$ ) or acidic ( $\text{pH}=5.5$ ) conditions ( $n = 3$ ).



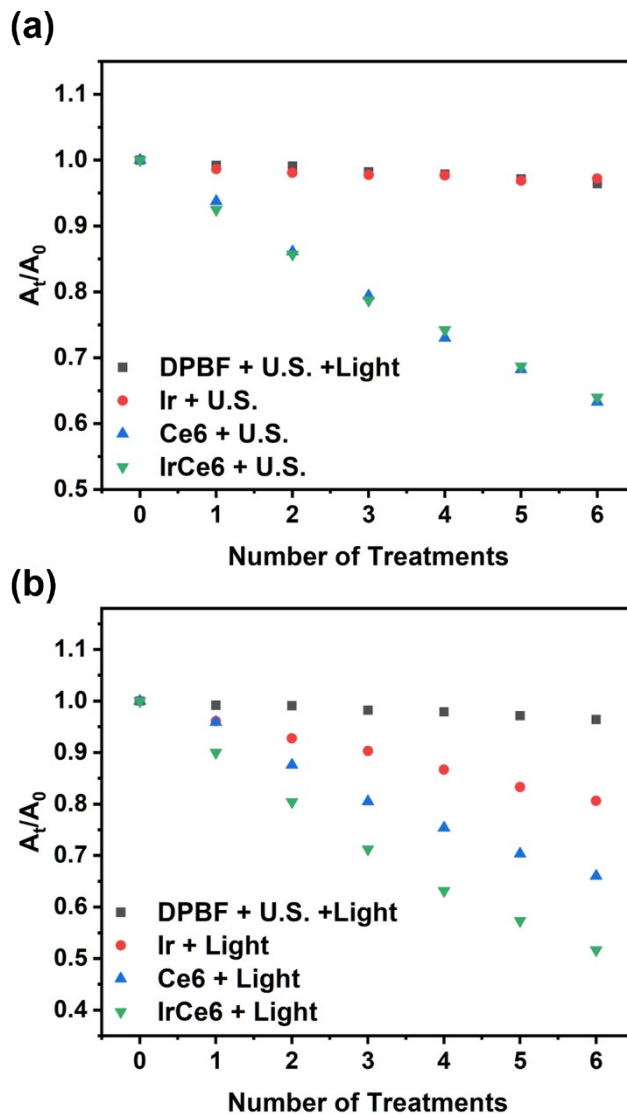

**Figure S5.** Change in absorption of DPBF at 416 nm upon incubation with Ir, IrCe6, or Ce6 (0.5  $\mu$ M) and exposure to (a) ultrasound radiation (1 MHz, 50% duty cycle, 1.5 W  $\text{cm}^{-2}$ , 1 min) or (b) light irradiation (405 nm, 0.5 J  $\text{cm}^{-2}$ ).

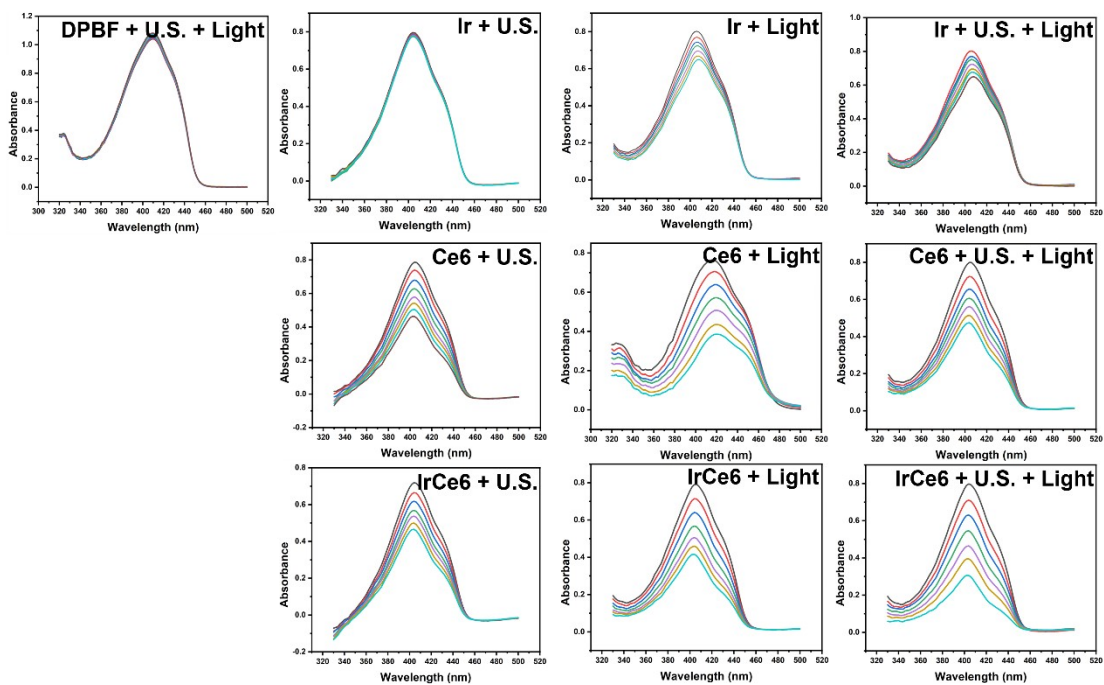

**Figure S6.** UV-vis spectra of DPBF upon incubation with Ir, IrCe6, or Ce6 (0.5  $\mu\text{M}$ ) and exposure to ultrasound radiation (1 MHz, 50% duty cycle, 1.5  $\text{W cm}^{-2}$ , 1 min), light irradiation (405 nm, 0.5  $\text{J cm}^{-2}$ ) or the combination of ultrasound radiation and light irradiation.

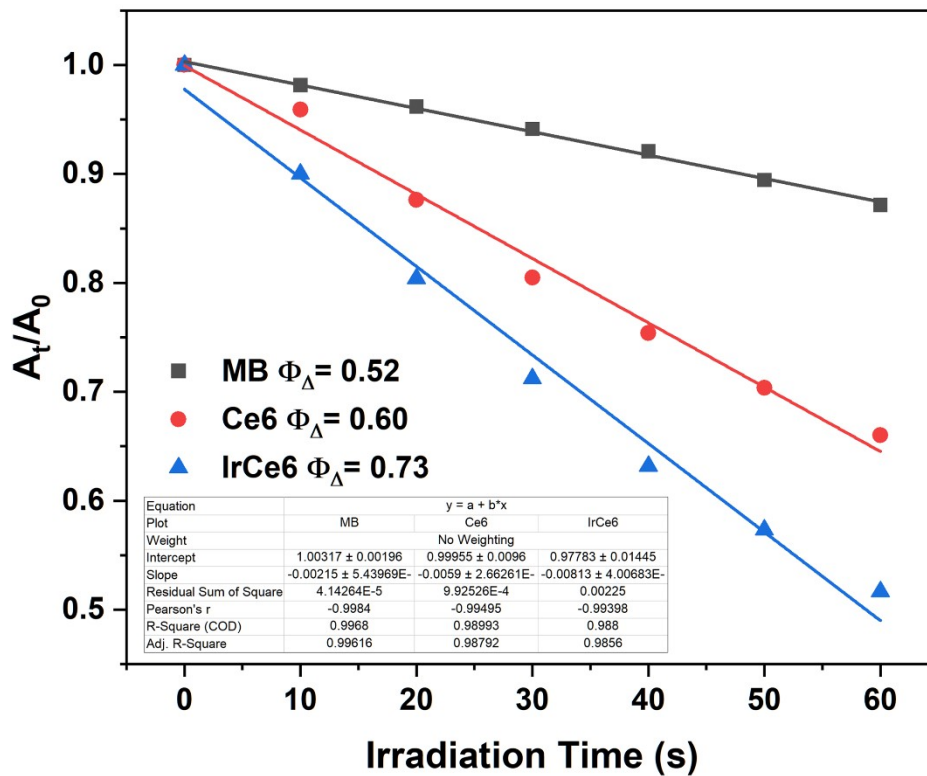

**Figure S7.** Determination of the singlet oxygen quantum yield of Ce6 and IrCe6 upon light irradiation (405 nm, 0.5 J cm<sup>-2</sup>).

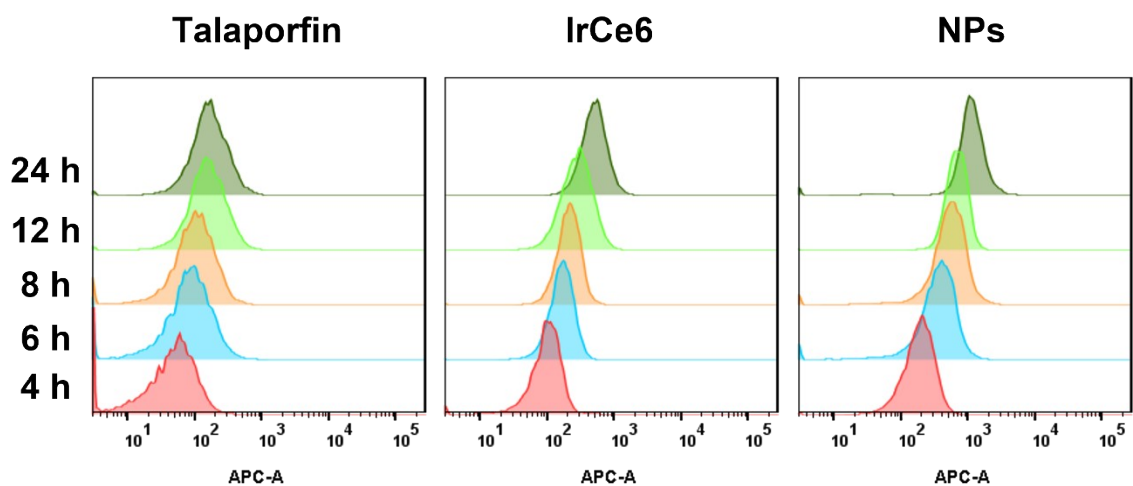

**Figure S8.** Representative flow cytometry results of the time-dependent cellular uptake of talaporfin, IrCe6, or NPs in A375 cells using the APC channel.

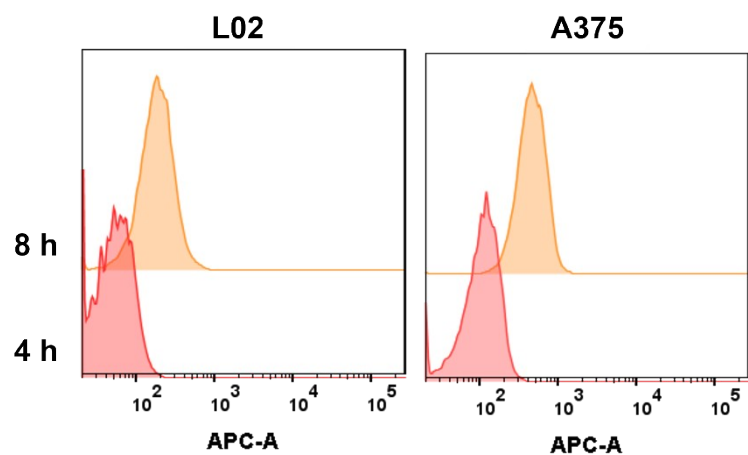

**Figure S9.** Representative flow cytometry results of the time-dependent cellular uptake of NPs in L02 cells or A375 cells using the APC channel.

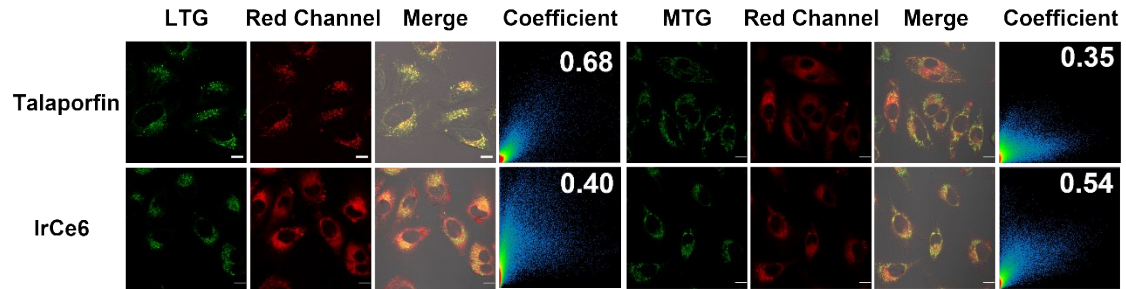

**Figure S10.** Confocal laser scanning microscopy images of A375 cells incubated with **talaporfin** or **IrCe6** for 8 h and co-stained with Lyso-Tracker Green (LTG) or Mito-Tracker Green (MTG), Scale bars: 10  $\mu$ m.

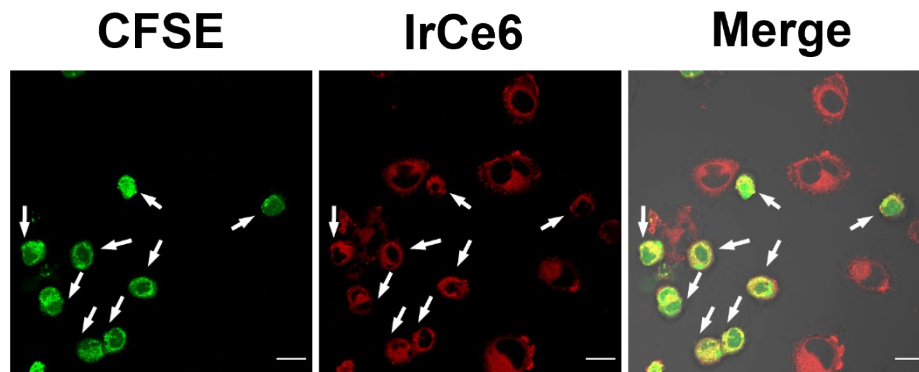

**Figure S11.** Confocal laser scanning microscopy images of the mixture of fluorescent dye carboxyfluorescein diacetate succinimidyl ester (CFSE) labeled non-cancerous L02 cells and unlabeled cancerous A375 cells, the mixture of cells was incubated with **IrCe6** for 8 h. Scale bars: 10  $\mu$ m.

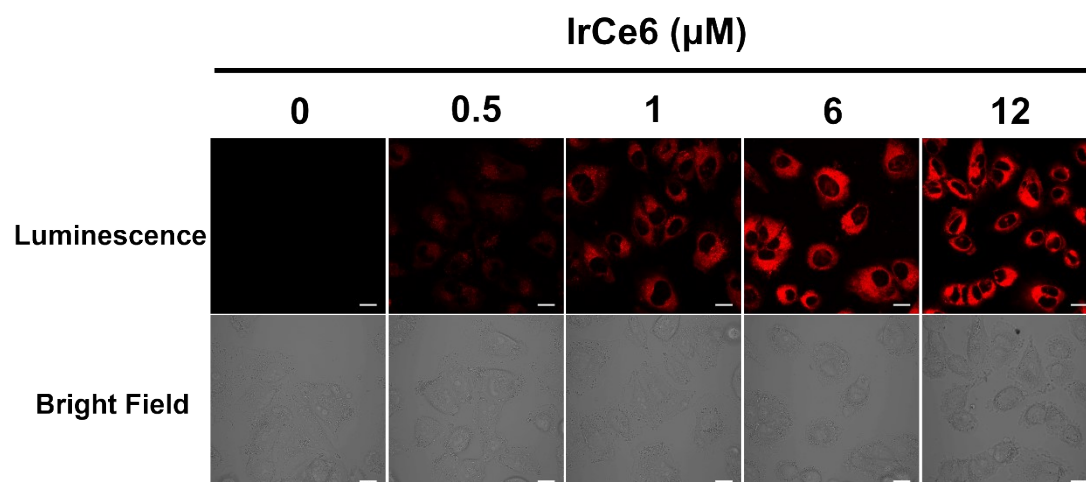

**Figure S12.** Confocal imaging of A375 cells incubated with increased concentration of **IrCe6** (0, 0.5, 1, 6, 12  $\mu\text{M}$ ) for 8 h. The excitation wavelength for IrCe6 was set at 405 nm and the luminescence was recorded from 650 to 680 nm. Scale bars: 10  $\mu\text{m}$ .

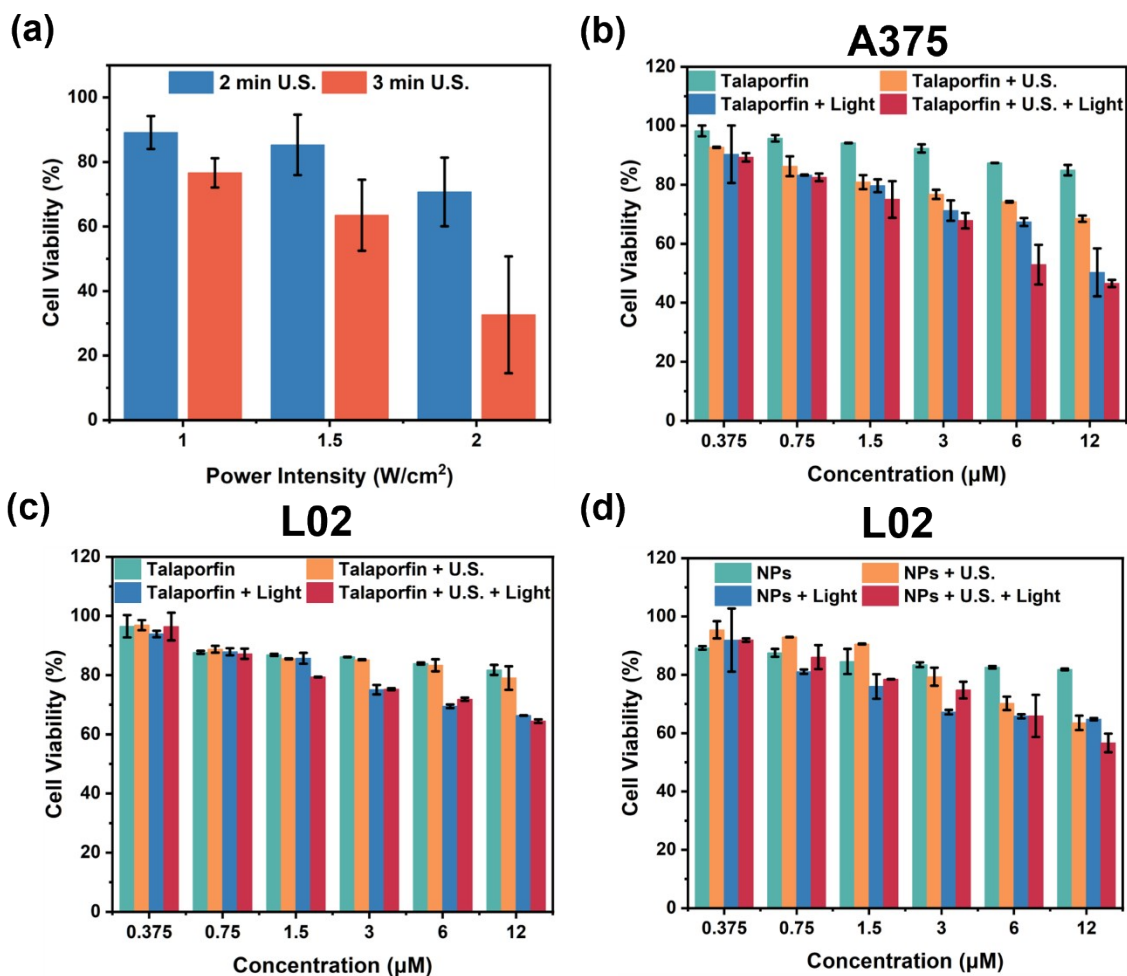

**Figure S13.** (a) Relative cell viability of A375 cells treated with ultrasound radiation (1 MHz, 50% duty cycle) using various power intensities and radiation times. (b) Relative cell viability of A375 cells incubated with increasing concentrations of **talaporfin** and exposure to ultrasound radiation (1 MHz, 50% duty cycle, 1.5 W cm<sup>-2</sup>, 2 min) and/or light irradiation (405 nm, 0.5 J cm<sup>-2</sup>). (c) Relative cell viability of L02 cells incubated with increasing concentrations of **talaporfin** and exposure to ultrasound radiation (1 MHz, 50% duty cycle, 1.5 W cm<sup>-2</sup>, 2 min) and/or light irradiation (405 nm, 0.5 J cm<sup>-2</sup>). (d) Relative cell viability of L02 cells incubated with increasing concentrations of **NPs** and exposure to ultrasound radiation (1 MHz, 50% duty cycle, 1.5 W cm<sup>-2</sup>, 2 min) and/or light irradiation (405 nm, 0.5 J cm<sup>-2</sup>).

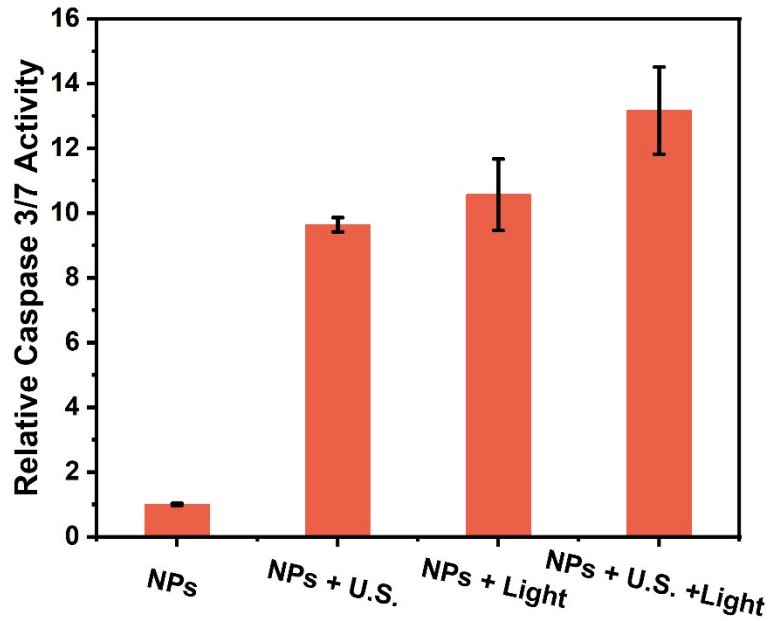

**Figure S14.** Relative caspase 3/7 activity of A375 cells incubated with **NPs** upon incubation in dark; exposure to ultrasound radiation (1 MHz, 50% duty cycle,  $1.5 \text{ W cm}^{-2}$ , 2 min); exposure to light irradiation ( $405 \text{ nm}$ ,  $0.5 \text{ J cm}^{-2}$ ), or exposure to a combination of ultrasound radiation and light irradiation ( $n = 3$ ).



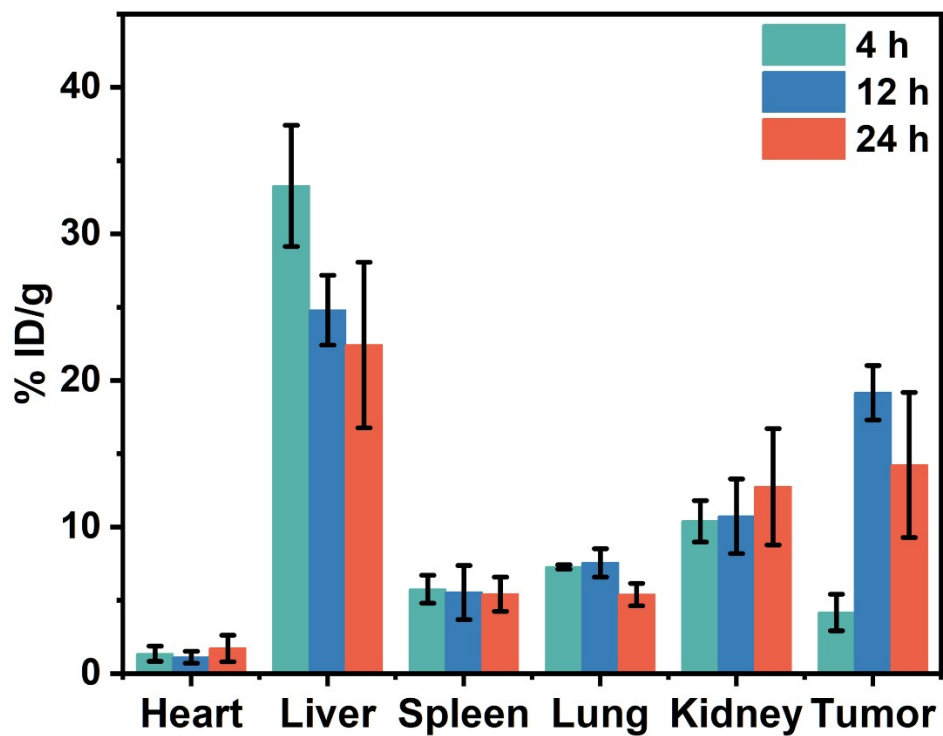

**Figure S15.** Biodistribution of NPs in major organs and tumor 4 h, 12 h, or 24 h after the administration examined by ICP-MS (n = 3).

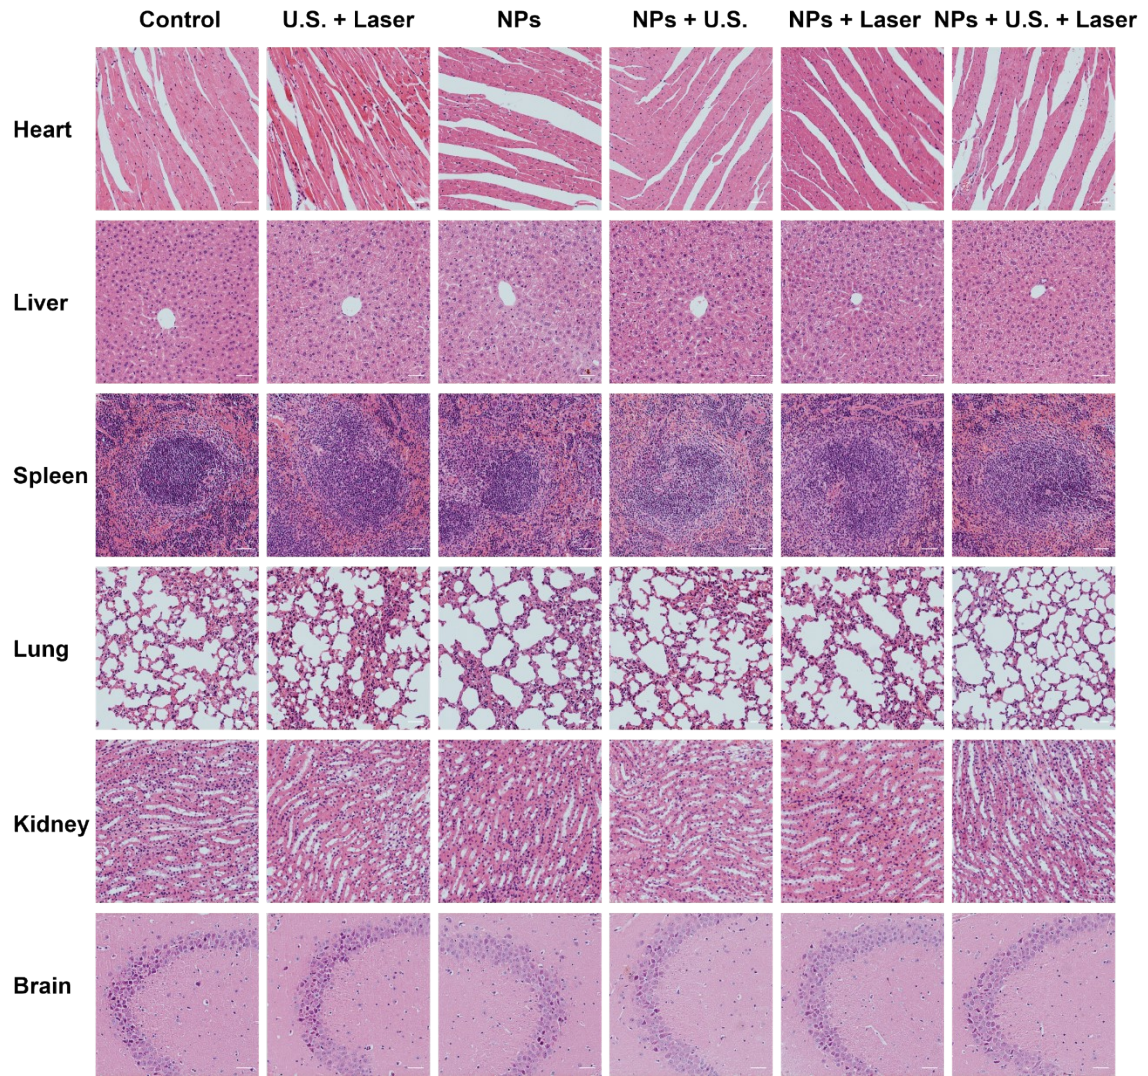

**Figure S16.** H&E stained histopathologic slices of the major organs of A375 tumor xenograft mice after various treatments. Scale bars: 50  $\mu$ m.
